# Supplementary material for: Colloidal aggregation in anisotropic liquid crystal solvent
Source: Royal Society of Chemistry journal article supplement (doi:10.1039/d1sm00542a), 2021-01-01
Supplement: d1sm00542a3.pdf [file d1sm00542a3.pdf]

## Supplementary Information

### Colloidal aggregation in anisotropic liquid crystal solvent

Devika Gireesan Sudha,<sup>a</sup> Jocelyn Ochoa <sup>b</sup> and Linda S Hirst <sup>\*a</sup>

<sup>a</sup> Department of Physics, University of California, Merced, 5200 N. Lake Rd, Merced, CA 95343, USA. E-mail: lhirst@ucmerced.edu

<sup>b</sup> Department of Chemistry, University of California, Merced, 5200 N. Lake Rd, Merced, CA 95343, USA

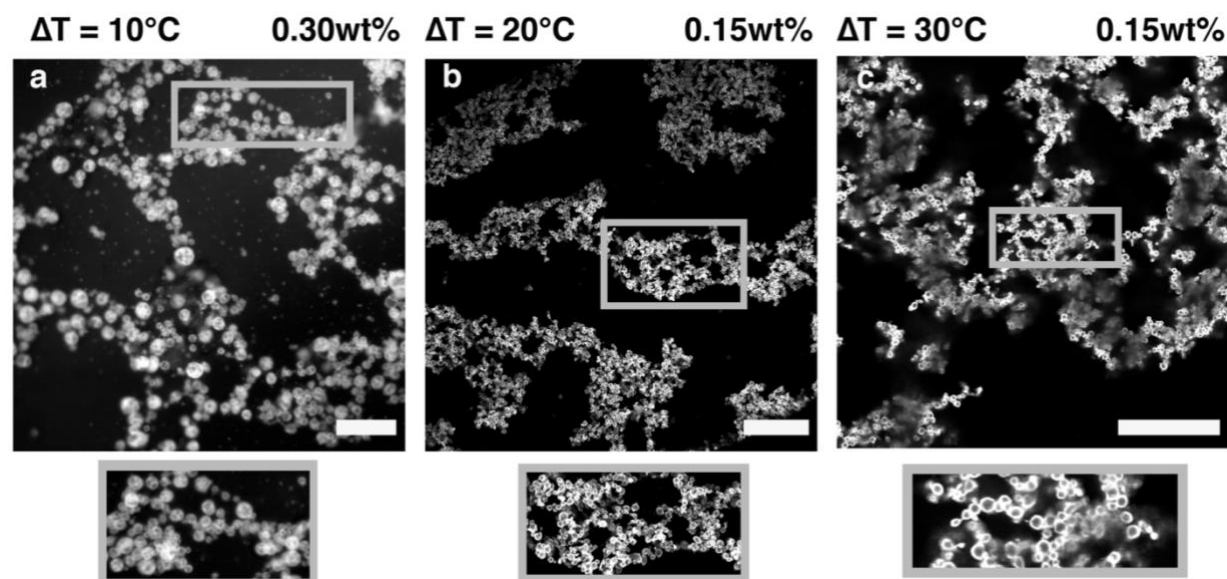

**Supplementary Figure S1.** Additional examples of aggregate structures with enlarged highlighted insets showing colloid chaining features. **a)** Fluorescence microscopy image of aggregate formed at a quench depth  $\Delta T = 10^\circ\text{C}$  and 0.30 wt% of ligand modified QDs in 5CB liquid crystal, scale bar 100 $\mu\text{m}$ . Laser scanning confocal tile scan images of aggregate formed at quench depth **b)**  $\Delta T = 20^\circ\text{C}$  (scale bar 100 $\mu\text{m}$ ) and **c)**  $\Delta T = 30^\circ\text{C}$  (scale bar 20 $\mu\text{m}$ ) at 0.30 wt% ligand modified QDs in 5CB liquid crystal.

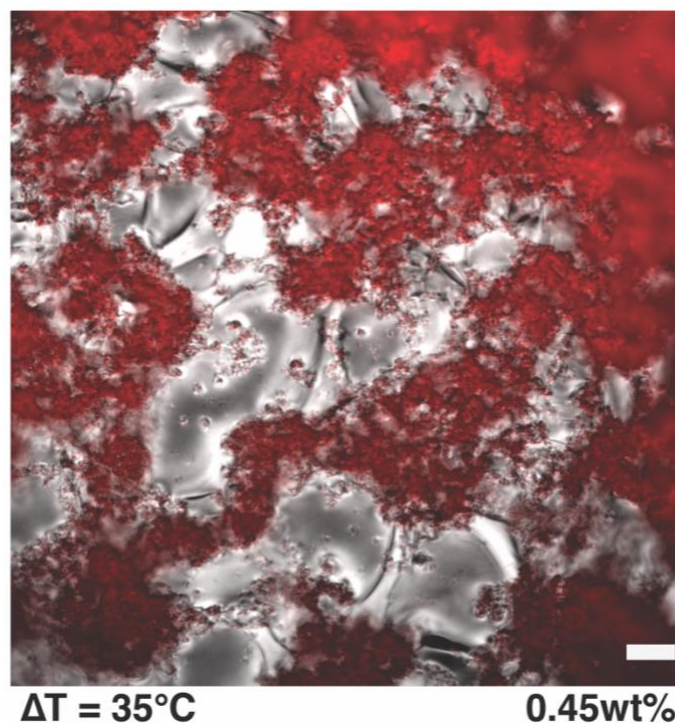

**Supplementary Figure S2.** Overlaid fluorescence microscopy image (red) of an aggregate (quench depth  $\Delta T = 35^{\circ}\text{C}$ , 0.45 wt% QDs in 5CB liquid crystal), with the corresponding birefringence image using crossed polarizers to highlight defect lines in the nematic phase. Scale bar 100 $\mu\text{m}$ .

### Supplementary Movie Captions

**Supplementary Movie 1.** Fluorescence microscopy video showing the initial 2 min of the aggregation process for a quench depth  $\Delta T = 20^{\circ}\text{C}$  with 0.30 wt% ligand modified QDs in 5CB liquid crystal.

**Supplementary Movie 2.** Fluorescence microscopy video recorded 200s after the initial quench showing aggregate ageing. Quench depth  $\Delta T = 20^{\circ}\text{C}$  with 0.30 wt% ligand modified QDs in 5CB liquid crystal. Total time = 30 min.

**Supplementary Movie 3.** Fluorescence microscopy video highlighting line contraction and void formation for an aggregate formed at a quench depth  $\Delta T = 10^{\circ}\text{C}$  and 0.30 wt% ligand modified QDs in 5CB liquid crystal.
